# Supplementary material for: Pinwheel motifs: formation of unusual homo- and hetero-nuclear aggregates via bridging thiolates
Source: Royal Society of Chemistry journal article supplement (doi:10.1039/b303851c), 2003-01-01
Supplement: b303851c-2.doc [file b303851c-2.doc]

*Crystal data for* 1. C34H65B4F16N9Ni6S8, *M* = 1555.93, cubic, *a* = 25.796(5) Å, *U* = 17166(6) Å3, *T* = 220(2) K, space group *I*432 (No. 211), *Z* = 12, *D*c = 1.806 g cm-3, µ(Mo-*K*α) = 2.316 mm‑1, 1899 unique reflections measured, corrected for absorption (*R*int 0.094) and used in all calculations. Final *R*1 [1422 *I*  2(*I*)] = 0.066 and *wR*(all *F*2) was 0.129. The Flack parameter refined to 0.02(6). Disorder in the counter-anions and the acetonitrile solvent molecule was modelled by using restraints to distances, angles and *U*ij components.

Crystal data for **2**: C44H92B4F16N12Pd6S8, *M* = 2031.42, triclinic, *a* = 11.594(5), *b* = 13.393(6), *c* = 25.598(11) Å, α = 77.182(7), β = 89.969(8), γ = 76.473(7)º, *U* = 3763(3) Å3, *T* = 150(2)K, space group *P*-1 (no. 2), *Z* = 2,  = 1.704 mm-1, 24288 reflection measured, 16451 unique (*R*int = 0.091). Final *R*1 [6448 *I* ≥ 2*(I)*] = 0.095, *wR*2 (all data) = 0.288. Modelling was required for disorder in several parts of the structure, notably in three of the four BF4- anions but also in the solvent and to a much lesser extent in the cation. Limited data quality only allowed Pd, S and N atoms to be refined with anisotropic displacement parameters. The highest *F* peak lies only 1.08 Å from a Pd site.

*Crystal data for* 3. C17H34Cu2F12Ni3P2S12, *M* = 1216.32, orthorhombic, *a* = 17.466(3), *b* = 22.546(7), *c* = 12.156(7) Å, *U* = 4787(3) Å3, *T* = 150(2) K, space group *Pnma* (No. 62), *Z* = 4, *D*c = 1.688 g cm-3, µ(Mo-*K*α) = 2.683 mm‑1, 4324 unique reflections measured, corrected for absorption (*R*int 0.024) and used in all calculations. Final *R*1 [2788 *I*  2(*I*)] = 0.127 and *wR*(all *F*2) was 0.354. There is extensive disorder, including a *ca*. 70:30 disorder in the cation and the quality of the data did not allow refinement of anisotropic displacement parameters for the C atoms.
