# Supplementary material for: Pinwheel motifs: formation of unusual homo- and hetero-nuclear aggregates via bridging thiolates
Source: Royal Society of Chemistry journal article supplement (doi:10.1039/b303851c), 2003-01-01
Supplement: b303851c.doc [file b303851c.doc]

**SUPPLEMENTARY INFORMATION**

**EXPERIMENTAL**

Synthesis of *N,N’*-bis(2-mercaptoethyl)piperazine (L1H2)

Piperazine (0.50g, 5.8mmol) was dissolved in dry benzene (20cm3) and ethylene sulfide (0.70g, 11.6mmol) was added. The mixture was sealed in a pressure vessel and heated at 60OC for 48 h. The solvent was removed *in vacuo* to yield a white solid (1.01g, 85%). m.p. 46-47OC; elemental analysis: C8H18N2S2 requires C 46.6, H 8.7 N 13.6%, found C 46.3 H 8.6 N 13.4%. max/cm-1 (neat) 2938m, 2807m, 2561w, 1457w, 1307w, 1271w, 1157w, 1006w, 805w, 668w; H(CDCl3) 1.73 (2H, br. s, CH2SH), 2.47 (8H, s, NCH2CH2N) and 2.54-2.61 (8H, m, HSCH2CH2N); C(CDCl3) 21.99 (HSCH2CH2N), 52.78 (NCH2CH2N) and 60.98 (HSCH2CH2N); EI MS *m/z* (204) (*M*-2H).

Synthesis of N,N'-bis(2-mercaptoethyl)-N,N'-dimethyl-1,3-propanediamine (L2H2)

Ethylene sulfide (0.59g, 9.8mmol) was added to N,N'-dimethyl-1,3-propanediamine (0.50g, 4.9mmol) in dry benzene (20cm3). The mixture was sealed in a pressure vessel and heated at 60OC for 48 hours. The solvent was removed *in vacuo* to yield a colourless oil (0.89g, 82%). elemental analysis: C9H22N2S2 requires C 48.6, H 9.9 N 12.6%, found C 48.5 H 10.1 N 12.5%. max/cm-1 (neat) 2943m, 2850m, 2540w, 1458w, 1355w, 1299w, 1219w, 1126w, 1051w, 847w, 721w, 668w; H(CDCl3) 1.58 (2H, q, NCH2CH2CH2N), 1.72 (2H, br. s. NCH2CH2SH), 2.17 (6H, s, CH3N(CH2)3NCH3), 2.35 (4H, t, NCH2CH2CH2N) and 2.46-2.60 (8H, m, HSCH2CH2N); C(CDCl3) 22.64 (HSCH2CH2N), 25.25 (NCH2CH2CH2N), 41.90 (CH3N(CH2)3NCH3), 55.37 (NCH2CH2CH2N) and 60.40 (HSCH2CH2N); EI MS *m/z* (220) (*M*-2H).

Synthesis of [Ni2{Ni(L1)}4](BF4)4.MeCN, **1**

[Ni(H2O)6][BF4]2 (0.50g, 1.47mmol) was dissolved in MeCN (10cm3) and a solution of *N,N’*-bis(2-mercaptoethyl)piperazine L1H2 (0.20g, 0.98mmol) dissolved in MeCN (10cm3) was added dropwise. The solution was stirred for 24h, after which an excess of Et2O was added to yield a dark red precipitate. The precipitate was filtered and dried *in vacuo*, 0.34g, 92%. Crystals were grown from MeCN/benzene. Found C, 25.83; H, 4.24; N, 7.77%. C32H64B4F16N8Ni6S8 requires C, 25.34; H, 4.25; N, 7.39%. C(CD3CN) 31.04 (NCH2CH2S), 53.85 and 58.02 (NCH2CH2N) and 61.22 (NCH2CH2S); max/cm-1 (KBr) 2925w, 2875w, 1560w, 1456w, 1330w, 1307w, 1260w, 1124m, 1104m, 1084s, 1062m, 1036m, 778m, 423w; FAB MS *m/z* no assignable peaks.

Synthesis of [Pd2{Pd(L2)}4](BF4)4 , **2**

[Pd(MeCN)4][BF4]2 (0.10g, 0.23mmol) was dissolved in MeCN (10cm3) and a solution of N,N'-bis(2-mercaptoethyl)-N,N'-dimethyl-1,3-propanediamine (L3H2) (0.33g, 0.15mmol) dissolved in MeCN (10cm3) was added dropwise. The solution was stirred for 24 hours, after which an excess of diethyl ether was added to yield a yellow precipitate. The precipitate was filtered and dried *in vacuo*, 0.06g, 84%. Crystals were grown from MeCN/Et2O. Found C, 23.03; H, 4.47; N, 6.74%. C36H80B4F16N8Pd6S8 requires C, 23.16; H, 4.32; N, 6.00%. max/cm-1 (KBr) 2953w, 1471w, 1057m, 1036m, 780m, 522w; FAB MS *m/z* no assignable peaks.

Synthesis of [Cu2{Ni(L3)}3](PF6)2, **3**

[Cu(MeCN)4]PF6 (0.36g, 0.97mmol) was dissolved in CH2Cl2 (10cm3) and added to a stirred solution of [Ni(L2)] (0.41g, 1.44mmol) in CH2Cl2 (10cm3). The solution was stirred overnight and then filtered to yield a dark solid. 0.48g,79%. Crystals were grown from MeCN/Et2O. Found C, 22.34; H, 3.50; N, 2.19%. C21H42S12Ni3Cu2P2F12.2MeCN requires C, 22.17; H, 3.54; N, 2.07%. max/cm-1 (KBr) 2913w, 1420w, 1105w, 839s, 558m. FAB MS *m/z* 633 (*M* - Cu{Ni(L2)}(PF6)2).

Crystal data for **1**: C34H65B4F16N9Ni6S8, *M* = 1555.93, cubic, *a* = 25.796(5) Å, *U* = 17166(6)Å3, *T* = 220(2)K, space group *I*432 (no. 211), *Z* = 12,  = 2.316 mm-1, 4060 reflections measured, 1899 unique (*R*int = 0.094). Final *R*1 [1422 *I*  2(*I*)] = 0.0663, *wR*2 (all data) = 0.129 for all data. Disorder in the counter-anions and the acetonitrile solvent molecule was modelled by using restraints to distances, angles and *U*ij components.

Crystal data for **2**: C44H92B4F16N12Pd6S8, *M* = 2031.42, triclinic, *a* = 11.594(5), *b* = 13.393(6), *c* = 25.598(11) Å, α = 77.182(7), β = 89.969(8), γ = 76.473(7)º, *U* = 3763(3) Å3, *T* = 150(2)K, space group *P*-1 (no. 2), *Z* = 2,  = 1.704 mm-1, 24288 reflection measured, 16451 unique (*R*int = 0.091). Final *R*1 [6448 *I* ≥ 2*(I)*] = 0.095, *wR*2 (all data) = 0.288. The data show signs of twinning and an HKLF 5 format file was generated for a 180º rotation about the [001] direct lattice direction: refinement converged with 15% of the second twin component. Although this gave some improvement there is probably another, unidentified component present, as some large peaks of residual electron density remain. The largest difference electron density peaks are now adjacent to Pd sites and there does not appear to be a sensible structural model for the remaining smaller peaks. Alternative absorption corrections have been tried, as has refinement in space group *P*1, neither of which makes an improvement. There is disorder in several parts of the structure, with three of the four BF4- counteranions being disordered. Those of B2 and B4 have three out of four F sites modelled over two half-occupied sites while that of B3 has all four: geometric restraints were applied. Atoms C8, C10 and C11 are also each modelled over two sites, occupancy ratio 0.35:0.65. Distance restraints were also applied to this group and to other CC and CN distances. There same type of disorder probably affects the second half-cation, indicated by the large *U*iso for equivalent atoms but no additional sites could be found. The hydrogen sites for C7 and C12 are each modelled over two sites as they are necessarily disordered. One of the MeCN molecules was also modelled over two sites, in a 60:40 ratio.

Crystal data: C17H34Cu2F12Ni3P2S12, *M* = 1216.32, orthorhombic, *a* = 17.466(3), *b* = 22.546(7), *c* = 12.156(7) Å, *U* = 4787(3) Å3, *T* = 150(2)K, space group *Pnma* (no. 62), *Z* = 4,  = 2.683 mm-1, 4591 reflections measured, 4324 unique (*R*int = 0.024). Final *R*1 [2788 *I*  2(*I*)] = 0.127, *wR*2 (all data) = 0.354. There is extensive disorder, including a *ca*. 70:30 disorder in the cation.

Two chemically equivalent, but geometrically different cations were present in the asymmetric unit, their occupancies refined to *ca*.70:30, and H atoms were geometrically placed on the major component. In the minor component all atoms heavier than carbon were detected but not all carbons. Geometric and displacement parameters were subject to reasonable restraints. The initial refinement model converged with a conventional *R*1 [*F*  4(*F*)] of 0.31. Various conventional disorder models were investigated and extensive attempts made to identify possible twinning, all without success. Finally, we identified a group of the largest positive residual peaks forming a structural fragment whose gross geometry was similar to that of the initial refinement model. We expected this fragment to be an alternative orientation of the initial model but after further refinement to *R*1 of 0.13 it became clear that there were major structural differences between the two disorder components; in particular the Cu...Cu distance in the second was much greater, *ca.* 3.40 Å, suggesting that another conformation of **2** is present. As the ratio of the major to minor components was *ca*.70:30, it was not wholly surprising that we were unable to locate all the C atoms of the minor component as their scattering power is only marginally greater than that of H. This is one reason why we have limited discussion in the paper to the major disorder component.

**Examples of space group *I*432 (no. 211) in the CSD**

*Cis*-dimethyl-bis(bis(dimethylphosphino)methane-P,P')iron: Wai Kwok, Wong Kwok, W. Chiu, G. Wilkinson, A.J.Howes, M.Motevalli, M.B.Hursthouse, *Polyhedron* 1985, **4**, 603.

Tetrakis(2-N,N'-diphenylformamidine-N,N')-diplatinum: F.A. Cotton, J.H. Matonic, C.A.Murillo, *Inorg. Chem*. 1996, **35**, 498.

Hexakis(2,8,14,20-tetramethyl-4,6,10,12,16,18,22,24-octahydroxycalix(4)arene) dodecakis(nitrobenzene) clathrate decahydrate: L.R. Macgillivray, J.L.Attwood,

*Nature (London)* 1997, **389**, 469.

Tris(3-(S)-(-)-2,2'-dihydroxy-1,1'-binaphthyl)-tris(1,2-dimethoxyethane)-gallium-tri-lithium tetrahydrofuran solvate:  J. Pauls, S. Chitsaz, B. Neumuller, *Z. Anorg. Allg. Chem.*

2000, **626**, 2028.

Tris(3-(S)-(-)-2,2'-dihydroxy-1,1'-binaphthylato)-tris(dimethoxyethane-o,o')-tri-indium-tri-lithium tetrahydrofuran solvate: S. Chitsaz, B. Neumuller, *Organometallics* 2001, **20**, 2338.

Pentakis(tetraethylammonium) nonakis(2-chloro)-tris(2-oxo)-hexacyano-hexa-niobium hydrate: N.G. Naumov, S. Cordier, C. Perrin, *Angew. Chem., Int. Ed. Engl*. 2002, **41**, 3002.

Table 1. Selected bond lengths (Å) and angles (O) for [Ni2{Ni(L1)4}](BF4)4MeCN **1.**

Ni(1)-N(1) 1.928(10) N(4)-Ni1-N(1) 77.3(5)

Ni(1)-N(4) 1.909(12) N(4)-Ni(1)-S(1) 166.0(4)

Ni(1)-S(1) 2.165(4) N(1)-Ni(1)-S(1) 89.0(3)

Ni(1)-S(4) 2.165(4) N(4)-Ni(1)-S(4) 90.9(4)

Ni(2)-S(4) 2.227(3) N(1)-Ni(1)-S(4) 167.4(3)

Ni(3)-S(1) 2.212(3) S(1)-Ni(1)-S(4) 103.02(15)

Ni(2)...Ni(3) 3.024(7) S(4)-Ni(2)-S(4A) 178.1(3)

S(4)-Ni(2)-S(4B) 89.984(4)

S(1)-Ni(3)-S(1A) 175.0(2)

S(1)-Ni(3)-S(1B) 89.891(10)

Table 2. Selected bond lengths (Å) and angles (O) for [Pd2{Pd(L2)4}](BF4)4 **2.**

Pd(1)-N(4) 2.094(15) N(4)-Pd(1)-N(9) 94.4(7)

Pd(1)-N(9) 2.114(16) N(4)-Pd(1)-S(13) 174.8(5)

Pd(1)-S(1) 2.285(5) N(4)-Pd(1)-S(1) 87.5(5)

Pd(1)-S(13) 2.271(5) N(9)-Pd(1)-S(1) 174.6(5)

Pd(2)-S(13) 2.337(5) N(9)-Pd(1)-S(13) 87.0(6)

Pd(2)...Pd(2B) 3.089(3) S(1)-Pd(1)-S(13) 90.6(2)

S(13)-Pd(2)-S(1B) 176.3(2)

S(13)-Pd(2)-S(26B) 90.2(2)

Table 3. Selected bond lengths (Å) and angles (O) for [Cu2{Ni(L3)3}](PF6)2 **3**.

Ni(1)-S(11) 2.186(6) S(41)-Ni(1)-S(11) 90.6(2)

Ni(1)-S(41) 2.171(6) S(12)-Ni(2)-S(42) 92.1(2)

Ni(2)-S(12) 2.174(6) S(43)-Ni(3)-S(13) 91.1(2)

Ni(2)-S(42) 2.200(6) S(12)-Cu-(S13) 120.3(2)

Ni(3)-S(13) 2.174(6) S(12)-Cu-S(11) 120.4(2)

Ni(3)-S(43) 2.170(7) S(13)-Cu-S(11) 119.2(2)

Cu-S(11) 2.297(6) S(11A)-Ni(1)-S(41A) 90.6(2)

Cu-S(12) 2.287(6) S(11)-Ni(1)-S(41A) 175.8(3)

Cu-S(13) 2.289(6)

Cu...Cu(A) 2.983(6)
